# Supplementary material
Source: publisher site journal article supplement (https://static.cambridge.org/content/id/urn:cambridge.org:id:article:S1092852918001694/resource/name/S1092852918001694supp001.docx)
Supplement: Supplementary file 1 [file S1092852918001694supp001.docx]

**Left rostrolateral prefrontal cortex lesions REDUCE suicidal ideation in penetrating traumatic brain injury**

**Supplementary Table**

**Supplementary Table 1**. Differences in left rlPFC damage between SI+ and SI- excluding subjects with a history of unipolar depression, bipolar disorder or alcohol abuse. Data reported as means (standard errors)

| **Excluding subjects with** | | **N. subjects (SI-/SI+)** | | **SI-** | | | **SI+** | | **t testa** |
| --- | --- | --- | --- | --- | --- | --- | --- | --- | --- |
|  |  | |  |  |  |  |  |  |  |
| Unipolar Depressive Disorder | | | 106/15 |  | 11.3 (2.0) |  | 0.6 (0.4) |  | **t=5.1, p<0.001** |
|  |  | |  |  |  |  |  |  |  |
| Bipolar Disorder | | | 120/20 |  | 11.2 (1.9) |  | 0.6 (0.4) |  | **t=5.3, p<0.001** |
|  |  | |  |  |  |  |  |  |  |
| Alcohol Dependence Disorder | | | 118/20 |  | 10.8 (1.6) |  | 0.5 (0.3) |  | **t=4.6, p<0.001** |

a: All analyses adjusted for heteroskedasticity. Results confirmed using bootstrap (3,000 permutations).
